# Supplementary material
Source: Springer Nature journal article supplement (https://www.springermedizin.de/resource/supplementary/12887_2014_1126_MOESM1_ESM.pdf/9476542)
Supplement: MOESM1 [file 9476542]

Assessment process

1. Determine level of known prenatal alcohol exposure

2. Assess other required referral criteria

3. Refer if criteria are met

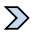

Criteria for referral

Confirmed significant exposure

Any confirmed exposure

Unknown exposure

Yes

Yes

Yes

i. Microcephaly or  
ii. 2 or more CNS deficits

i. 3 facial anomalies, or  
ii. 1 facial anomaly and growth deficit and CNS deficit

No<sup>†</sup>

Yes

Yes

Refer for specialist assessment
